# Supplementary material for: Potential prognostic value of delta-like protein 3 in small cell lung cancer: a meta-analysis
Source: Springer Nature journal article supplement (doi:10.1186/s12957-020-02004-5), 2020-08-26

**Fig.A.1.** Forest plots of prognostic value of DLL3 in SCLC. SCLC(small cell lung cancer), HR(hazard ratios), 95% CI (95% confidence intervals), DLL3(delta-like protein 3),  $I^2$ (percentage heterogeneity between studies),  $p$ (test for heterogeneity) .

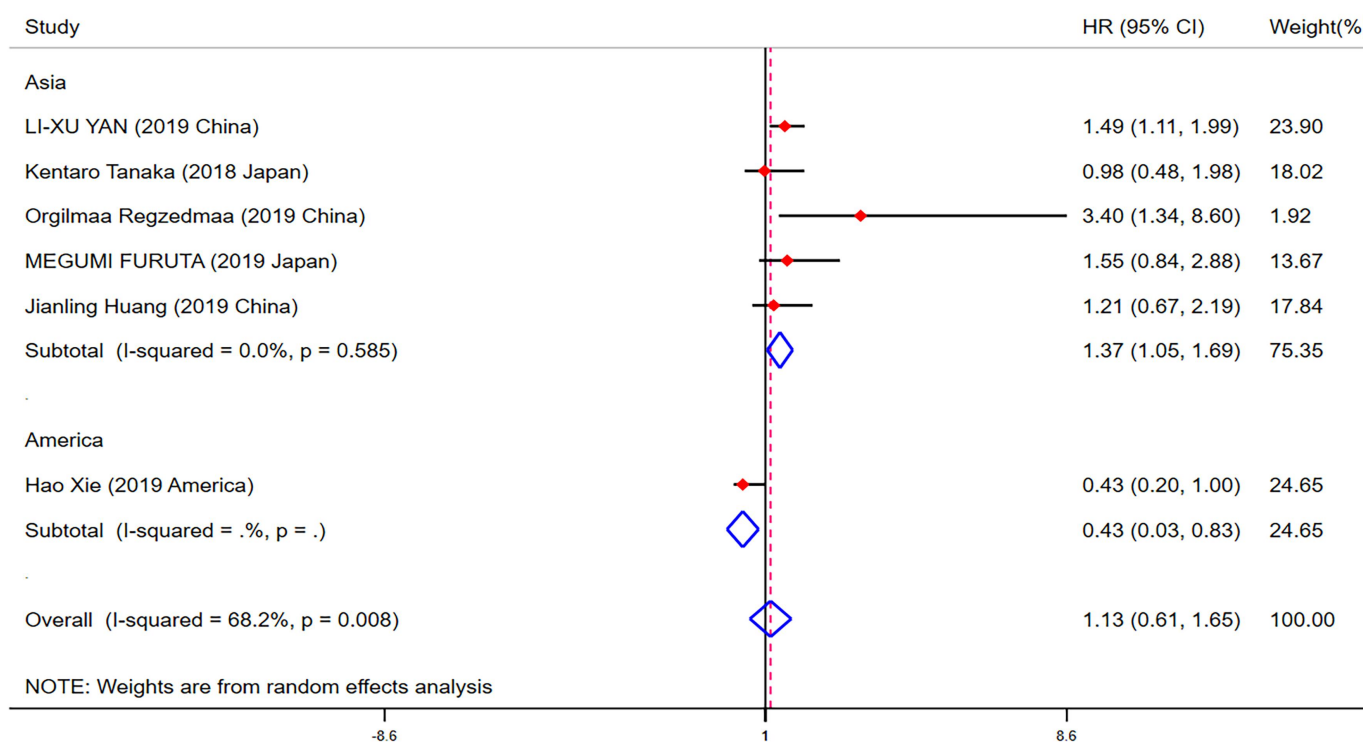

**Fig.A.2.** Forest plots of the correlation between DLL3 expression and sex of patients with SCLC. SCLC(small cell lung cancer), RR(relative ratios), 95% CI (95% confidence intervals), DLL3(delta-like protein 3),  $I^2$ (percentage heterogeneity between studies),  $p$ (test for heterogeneity) .

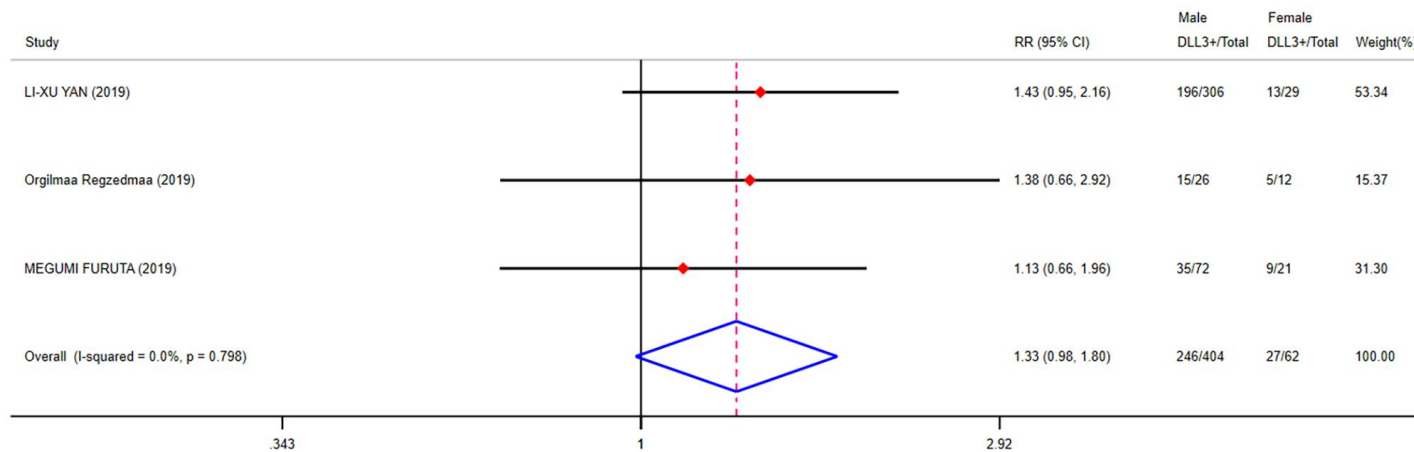

**Fig.A.3.** Forest plots of the correlation between DLL3 expression and smoking history of patients with SCLC. SCLC (small cell lung cancer), RR (relative ratios), 95% CI (95% confidence intervals), DLL3 (delta-like protein 3),  $I^2$  (percentage heterogeneity between studies),  $p$  (test for heterogeneity).

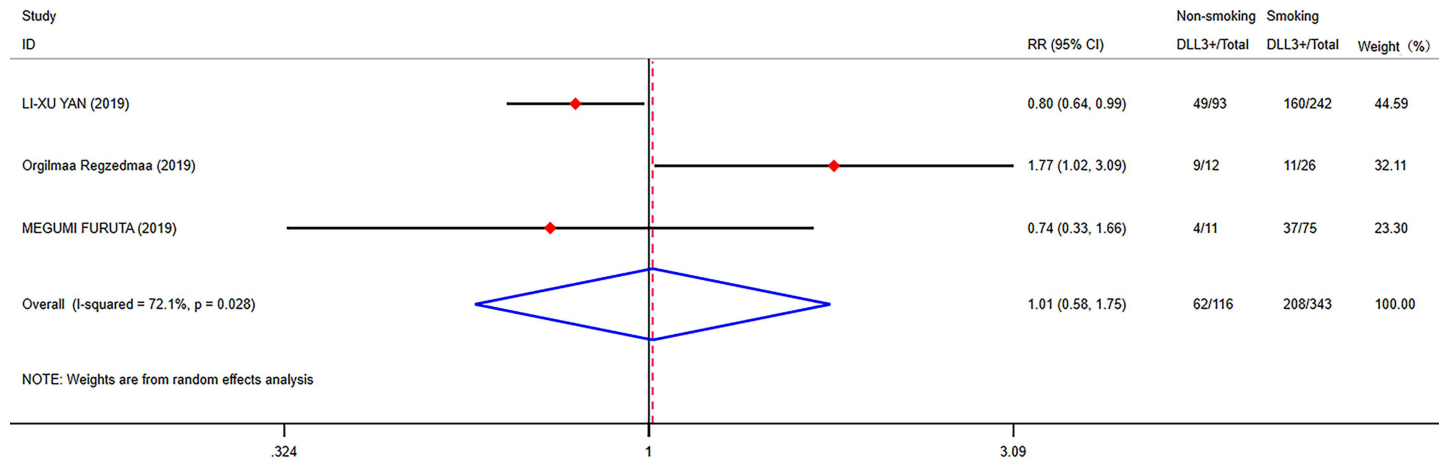

**Fig.A.4.** Forest plots of the correlation between DLL3 expression and tumour stage of patients with SCLC. SCLC (small cell lung cancer), RR (relative ratios), 95% CI (95% confidence intervals), DLL3 (delta-like protein 3),  $I^2$  (percentage heterogeneity between studies),  $p$  (test for heterogeneity).

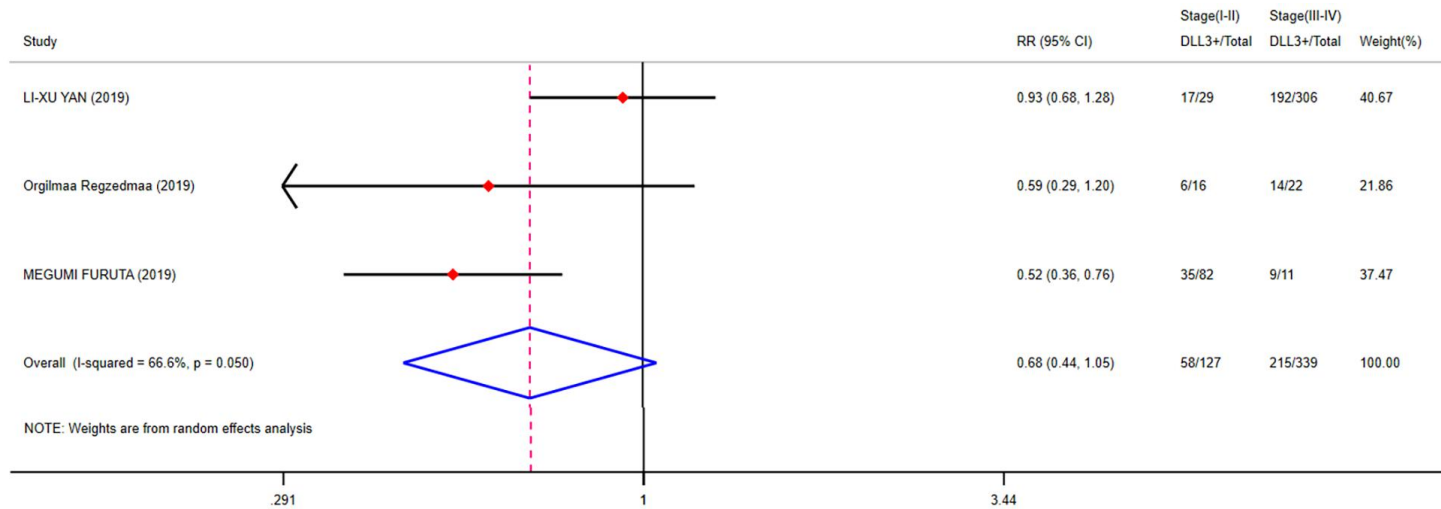

**Fig.A.5.** Forest plots of the correlation between DLL3 expression and metastasis of patients with SCLC. SCLC(small cell lung cancer), RR(relative ratios), 95% CI (95% confidence intervals), DLL3(delta-like protein 3),  $I^2$ (percentage heterogeneity between studies),  $p$ (test for heterogeneity) .

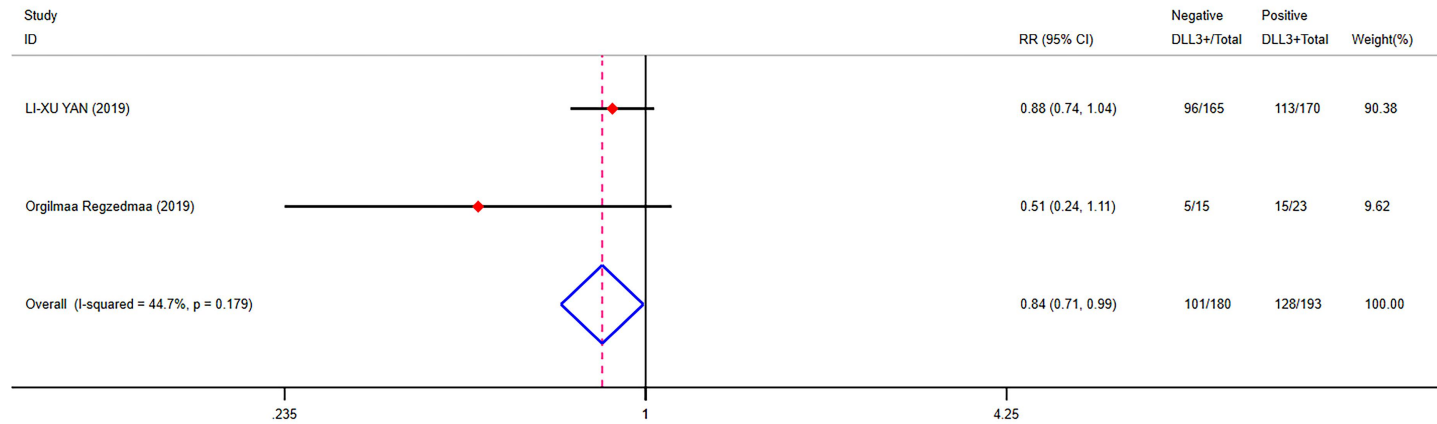

**Fig.A.6.** Sensitivity analysis of all the studies.

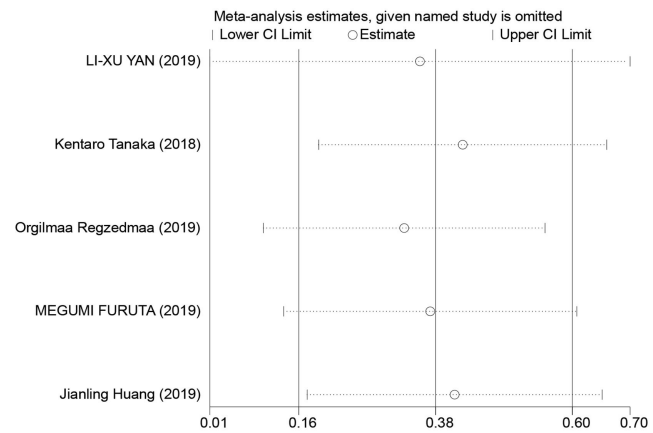

Supplement: MOESM2 [file 18317658]
